# Supplementary material for: In silico Screening of Chemical Libraries to Develop Inhibitors That Hamper the Interaction of PCSK9 with the LDL Receptor
Source: PubMed Central journal article supplement — Yonsei Med J. 2015 Jul 29;56(5):1251–7. doi: 10.3349/ymj.2015.56.5.1251 (PMC4541654; doi:10.3349/ymj.2015.56.5.1251), 2015-07-29
Supplement: ymj-56-1251-s002.pdf [file ymj-56-1251-s002.pdf]

**Supplementary Table 1. In Vitro Characteristics of Selected Chemicals with Docking Score Order 1–50**

| Lab No.* | Docking score | ChemBridge ID | MW    | Relative inhibition <sup>†</sup> | Dil-LDL uptake <sup>‡</sup> | Amount of the LDLR <sup>§</sup> | Amount of PCSK9 <sup>§</sup> |
|----------|---------------|---------------|-------|----------------------------------|-----------------------------|---------------------------------|------------------------------|
| CBC_1    | 28.40         | 5323858       | 348.5 | 36.8%                            | 1.55                        | 1.72                            | 0.97                         |
| CBC_2    | 27.26         | 5422509       | 419.5 | 49.7%                            | 1.97                        | 1.58                            | 0.97                         |
| CBC_3    | 27.12         | 5423970       | 389.5 | 43.9%                            | 1.85                        | 1.42                            | 0.53                         |
| CBC_4    | 28.18         | 5428460       | 400.5 | 31.7%                            | 1.35                        | 0.93                            | 0.60                         |
| CBC_5    | 27.15         | 5573554       | 276.3 | 10.7%                            | 1.08                        | 1.03                            | 0.29                         |
| CBC_6    | 27.20         | 5646807       | 393.5 | 17.2%                            | 0.85                        | 0.91                            | 0.68                         |
| CBC_7    | 27.00         | 5679233       | 405.5 | 12.6%                            | 1.11                        | 0.77                            | 0.75                         |
| CBC_8    | 28.45         | 5781565       | 415   | 37.3%                            | 1.49                        | 1.40                            | 1.07                         |
| CBC_9    | 28.82         | 5834186       | 445.5 | 12.9%                            | 0.90                        | 0.84                            | 0.57                         |
| CBC_10   | 27.78         | 5851930       | 404.5 | 9.9%                             | 0.85                        | 0.93                            | 0.76                         |
| CBC_11   | 27.27         | 5862390       | 397.3 | 4.5%                             | 0.94                        | 0.81                            | 0.49                         |
| CBC_12   | 28.36         | 5865258       | 430.2 | -2.0%                            | 1.08                        | 0.74                            | 0.68                         |
| CBC_13   | 28.17         | 6577494       | 455.6 | 41.4%                            | 1.66                        | 1.77                            | 1.54                         |
| CBC_14   | 27.13         | 6578587       | 442.6 | 46.6%                            | 2.26                        | 1.20                            | 1.90                         |
| CBC_15   | 27.10         | 6579857       | 379.5 | 22.9%                            | 1.41                        | 1.44                            | 1.07                         |
| CBC_16   | 27.37         | 7000500       | 388.5 | 14.1%                            | 1.01                        | 0.26                            | 0.01                         |
| CBC_17   | 28.26         | 7011653       | 327.5 | 45.0%                            | 1.56                        | 0.92                            | 1.11                         |
| CBC_18   | 27.90         | 7017850       | 299.4 | 49.9%                            | 1.56                        | 0.69                            | 0.98                         |
| CBC_19   | 27.50         | 7021996       | 341.5 | 38.3%                            | 1.59                        | 1.37                            | 1.20                         |
| CBC_20   | 29.19         | 7300311       | 380.5 | -1.6%                            | 1.05                        | 0.87                            | 0.86                         |
| CBC_21   | 28.47         | 7319736       | 355.9 | 47.5%                            | 1.36                        | 1.09                            | 0.72                         |
| CBC_22   | 27.42         | 7497360       | 449.6 | 11.6%                            | 0.97                        | 1.19                            | 1.23                         |
| CBC_23   | 27.95         | 7596514       | 463.6 | 11.7%                            | 0.87                        | 1.15                            | 0.99                         |
| CBC_24   | 27.52         | 7597336       | 422.6 | 12.9%                            | 0.80                        | 0.80                            | 0.75                         |
| CBC_25   | 27.75         | 7682179       | 484   | 12.1%                            | 1.06                        | 1.18                            | 0.66                         |
| CBC_26   | 27.48         | 7732594       | 385.4 | 53.4%                            | 0.94                        | 0.56                            | 0.59                         |
| CBC_27   | 27.31         | 7736937       | 376.4 | 14.4%                            | 0.95                        | 0.88                            | 0.86                         |
| CBC_28   | 28.26         | 7796312       | 416.5 | -4.5%                            | 0.90                        | 0.79                            | 0.98                         |
| CBC_29   | 27.12         | 7877851       | 416.5 | 3.3%                             | 0.76                        | 1.32                            | 0.74                         |
| CBC_30   | 27.83         | 7883245       | 408.3 | 20.2%                            | 0.95                        | 1.10                            | 1.34                         |
| CBC_31   | 27.05         | 7891362       | 354.4 | 13.0%                            | 0.87                        | 0.87                            | 0.91                         |
| CBC_32   | 27.04         | 7922733       | 385.8 | 19.0%                            | 0.81                        | 0.64                            | 0.20                         |
| CBC_33   | 28.85         | 7925242       | 341.5 | 52.7%                            | 1.85                        | 1.86                            | 1.80                         |
| CBC_34   | 27.05         | 7925467       | 382.4 | -2.5%                            | 0.73                        | 0.87                            | 0.52                         |
| CBC_35   | 27.18         | 7926470       | 386.9 | -12.0%                           | 0.99                        | 0.87                            | 0.10                         |
| CBC_36   | 29.63         | 7926604       | 371.5 | 49.3%                            | 1.69                        | 1.57                            | 1.22                         |
| CBC_37   | 27.06         | 7941561       | 416.6 | 11.3%                            | 0.99                        | 0.29                            | 0.29                         |
| CBC_38   | 28.99         | 7949973       | 437.5 | -3.2%                            | 0.95                        | 1.37                            | 0.40                         |
| CBC_39   | 27.87         | 7962923       | 432.9 | 10.0%                            | 1.05                        | 0.81                            | 1.01                         |
| CBC_40   | 29.17         | 7966968       | 383.5 | 39.9%                            | 1.57                        | 1.08                            | 1.00                         |
| CBC_41   | 27.18         | 7968349       | 372.5 | 12.6%                            | 1.09                        | 0.76                            | 0.55                         |
| CBC_42   | 28.00         | 7969162       | 453.5 | 33.6%                            | 1.07                        | 0.93                            | 0.81                         |
| CBC_43   | 27.40         | 7983219       | 430.9 | 31.4%                            | 1.49                        | 1.04                            | 0.80                         |
| CBC_44   | 27.58         | 7984456       | 405.9 | 18.2%                            | 1.46                        | 1.43                            | 1.15                         |
| CBC_45   | 28.76         | 7990813       | 440.5 | -6.5%                            | 1.08                        | 0.83                            | 0.98                         |
| CBC_46   | 27.70         | 7998682       | 384.4 | 30.9%                            | 1.15                        | 0.92                            | 0.76                         |
| CBC_47   | 27.38         | 9024196       | 384.5 | 22.9%                            | 1.31                        | 0.99                            | 0.68                         |
| CBC_48   | 27.11         | 9025824       | 346.5 | 25.0%                            | 1.09                        | 1.08                            | 0.67                         |
| CBC_49   | 27.63         | 9070071       | 371.5 | 30.5%                            | 1.39                        | 1.43                            | 1.64                         |
| CBC_50   | 27.47         | 9148410       | 415.5 | 38.7%                            | 1.39                        | 1.17                            | 1.15                         |

MW, molecular weight; LDL, low density lipoprotein; LDLR, LDL receptor; PCSK9, proprotein convertase subtilisin/kexin type 9.

\*Lab No. is arbitrarily denoted according to the order of the ChemBridge ID number, <sup>†</sup>Relative inhibition represents the difference in percentile between the intensity of PCSK9-LDLR in the presence of the chemical and that in the presence of the vehicle (DMSO), which was set as 100%, <sup>‡</sup>Dil-LDL uptake denotes the factor of the mean fluorescence intensity in HepG2 cells treated with each chemical compared to that in cells treated with the vehicle, <sup>§</sup>The amount of LDLR or PCSK9 denotes the factor of the signal for LDLR or PCSK9, respectively, from immunoblot data analyzed by ImageJ.
