# Supplementary material for: In silico Screening of Chemical Libraries to Develop Inhibitors That Hamper the Interaction of PCSK9 with the LDL Receptor
Source: PubMed Central journal article supplement — Yonsei Med J. 2015 Jul 29;56(5):1251–7. doi: 10.3349/ymj.2015.56.5.1251 (PMC4541654; doi:10.3349/ymj.2015.56.5.1251), 2015-07-29
Supplement: ymj-56-1251-s003.pdf [file ymj-56-1251-s003.pdf]

**Supplementary Table 2. *In Vitro* Characteristics of Selected Chemicals with Docking Score Order 51–100**

| Lab No.* | Docking score | ChemBridge ID | MW    | Relative inhibition <sup>†</sup> | Dil-LDL uptake <sup>‡</sup> | LDLR <sup>§</sup> | PCSK9 <sup>§</sup> |
|----------|---------------|---------------|-------|----------------------------------|-----------------------------|-------------------|--------------------|
| CBC_51   | 26.99         | 7127155       | 468.5 | -2.6%                            | 0.95                        | 0.74              | 0.85               |
| CBC_52   | 26.99         | 7010655       | 295.4 | 15.4%                            | 1.80                        | 1.41              | 0.60               |
| CBC_53   | 26.98         | 6707210       | 409.6 | 28.4%                            | 1.74                        | 1.16              | 0.75               |
| CBC_54   | 26.98         | 7980928       | 391.9 | 2.6%                             | 1.74                        | 1.09              | 0.87               |
| CBC_55   | 26.97         | 7059604       | 448.4 | -5.3%                            | 1.03                        | 0.51              | 0.67               |
| CBC_56   | 26.95         | 9006787       | 370.4 | 26.1%                            | 1.02                        | 1.40              | 0.50               |
| CBC_57   | 26.94         | 6991769       | 318.5 | 12.5%                            | 2.18                        | 1.10              | 0.46               |
| CBC_58   | 26.89         | 7116267       | 469.6 | -27.9%                           | 1.49                        | 1.43              | 0.23               |
| CBC_59   | 26.86         | 6587027       | 339.8 | -5.8%                            | 1.18                        | 0.53              | 0.00               |
| CBC_60   | 26.85         | 5537034       | 332.4 | 4.6%                             | 0.94                        | 0.61              | 0.16               |
| CBC_61   | 26.84         | 6578162       | 459.6 | 14.9%                            | 1.03                        | 1.26              | 0.74               |
| CBC_62   | 26.81         | 9011745       | 356.4 | 4.7%                             | 1.02                        | 0.70              | 0.15               |
| CBC_63   | 26.81         | 7913488       | 402.5 | -11.1%                           | 0.90                        | 0.45              | 0.57               |
| CBC_64   | 26.79         | 6447900       | 400.5 | -0.6%                            | 2.04                        | 1.27              | 0.72               |
| CBC_65   | 26.79         | 7261073       | 353.5 | -1.8%                            | 1.17                        | 0.98              | 0.26               |
| CBC_66   | 26.78         | 7943026       | 493.4 | 10.2%                            | 1.93                        | 0.83              | 0.60               |
| CBC_67   | 26.75         | 5252938       | 378.4 | -10.6%                           | 1.08                        | 0.44              | 0.79               |
| CBC_68   | 26.74         | 5426872       | 389.5 | 10.0%                            | 0.52                        | 0.65              | 0.41               |
| CBC_69   | 26.74         | 7970741       | 345.5 | 5.8%                             | 1.22                        | 1.18              | 0.88               |
| CBC_70   | 26.73         | 9025813       | 348.4 | 9.8%                             | 2.06                        | 1.23              | 0.59               |
| CBC_71   | 26.69         | 7547620       | 361.4 | -8.5%                            | 1.01                        | 0.68              | 0.41               |
| CBC_72   | 26.69         | 5723280       | 330.4 | 25.8%                            | 1.21                        | 1.06              | 1.28               |
| CBC_73   | 26.68         | 5425499       | 345.5 | 18.9%                            | 1.93                        | 1.76              | 1.26               |
| CBC_74   | 26.67         | 7968546       | 341.5 | 19.6%                            | 1.94                        | 1.48              | 1.49               |
| CBC_75   | 26.67         | 5665101       | 459.5 | -1.5%                            | 1.23                        | 0.52              | 0.75               |
| CBC_76   | 26.66         | 7873145       | 381.5 | 7.0%                             | 1.10                        | 0.70              | 0.33               |
| CBC_77   | 26.66         | 9036091       | 337.4 | 16.0%                            | 1.18                        | 0.82              | 1.06               |
| CBC_78   | 26.64         | 7543524       | 368.4 | -2.7%                            | 1.44                        | 0.77              | 0.23               |
| CBC_79   | 26.62         | 5427177       | 398.5 | 52.3%                            | 1.76                        | 0.98              | 0.62               |
| CBC_80   | 26.62         | 7924529       | 299.4 | 6.9%                             | 1.49                        | 1.36              | 1.18               |
| CBC_81   | 26.62         | 7232922       | 431.5 | -10.0%                           | 1.35                        | 1.20              | 0.15               |
| CBC_82   | 26.61         | 6759201       | 397.6 | 12.1%                            | 1.32                        | 1.65              | 1.45               |
| CBC_83   | 26.61         | 9014232       | 327.8 | 22.5%                            | 2.08                        | 0.97              | 0.61               |
| CBC_84   | 26.59         | 7997500       | 377.5 | 11.9%                            | 1.34                        | 1.62              | 1.80               |
| CBC_85   | 26.59         | 7924880       | 329.5 | 18.6%                            | 1.44                        | 1.31              | 1.22               |
| CBC_86   | 26.58         | 9038237       | 348.4 | 8.4%                             | 1.54                        | 1.22              | 0.89               |
| CBC_87   | 26.55         | 7966644       | 385.5 | 11.2%                            | 1.80                        | 1.60              | 1.37               |
| CBC_88   | 26.48         | 7595292       | 373.9 | 3.3%                             | 1.09                        | 0.65              | 0.08               |
| CBC_89   | 26.48         | 7968661       | 475.5 | 3.2%                             | 1.26                        | 1.21              | 0.39               |
| CBC_90   | 26.47         | 7839314       | 389.4 | 6.2%                             | 0.76                        | 1.47              | 0.95               |
| CBC_91   | 26.44         | 7889540       | 366.4 | 2.5%                             | 1.12                        | 2.08              | 0.76               |
| CBC_92   | 26.43         | 9030034       | 422.4 | 1.1%                             | 1.46                        | 1.44              | 0.59               |
| CBC_93   | 26.41         | 6484579       | 375.5 | 2.3%                             | 1.18                        | 1.26              | 0.78               |
| CBC_94   | 26.39         | 7280568       | 366.5 | -5.6%                            | 1.11                        | 1.03              | 0.91               |
| CBC_95   | 26.35         | 7934110       | 416.5 | -12.5%                           | 0.91                        | 1.19              | 0.64               |
| CBC_96   | 26.34         | 6659178       | 403.4 | -11.3%                           | 1.01                        | 0.59              | 0.86               |
| CBC_97   | 26.33         | 9019728       | 371.5 | -0.2%                            | 1.44                        | 0.97              | 1.01               |
| CBC_98   | 26.32         | 7633305       | 397.4 | 6.0%                             | 1.05                        | 0.97              | 0.05               |
| CBC_99   | 26.31         | 7791626       | 434.6 | 11.5%                            | 0.91                        | 0.74              | 0.84               |
| CBC_100  | 26.24         | 7933432       | 444.5 | -3.0%                            | 0.85                        | 0.62              | 0.68               |

MW, molecular weight; LDL, low density lipoprotein; LDLR, LDL receptor; PCSK9, proprotein convertase subtilisin/kexin type 9.

\*Lab No. is arbitrarily denoted according to the order of the ChemBridge ID number, <sup>†</sup>Relative inhibition represents the difference in percentile between the intensity of PCSK9-LDLR in the presence of the chemical and that in the presence of the vehicle (DMSO), which was set as 100%, <sup>‡</sup>Dil-LDL uptake denotes the factor of the mean fluorescence intensity in HepG2 cells treated with each chemical compared to that in cells treated with the vehicle, <sup>§</sup>The amount of LDLR or PCSK9 denotes the factor of the signal for LDLR or PCSK9, respectively, from immunoblot data analyzed by ImageJ.
